# Supplementary material for: NHERF1 regulates the progression of colorectal cancer through the interplay with VEGFR2 pathway
Source: PubMed Central journal article supplement (PMC5352358; doi:10.18632/oncotarget.13949), 2016-12-15
Supplement: oncotarget-08-7753-s001.pdf [file oncotarget-08-7753-s001.pdf]

# NHERF1 regulates the progression of colorectal cancer through the interplay with VEGFR2 pathway

## Supplementary Materials

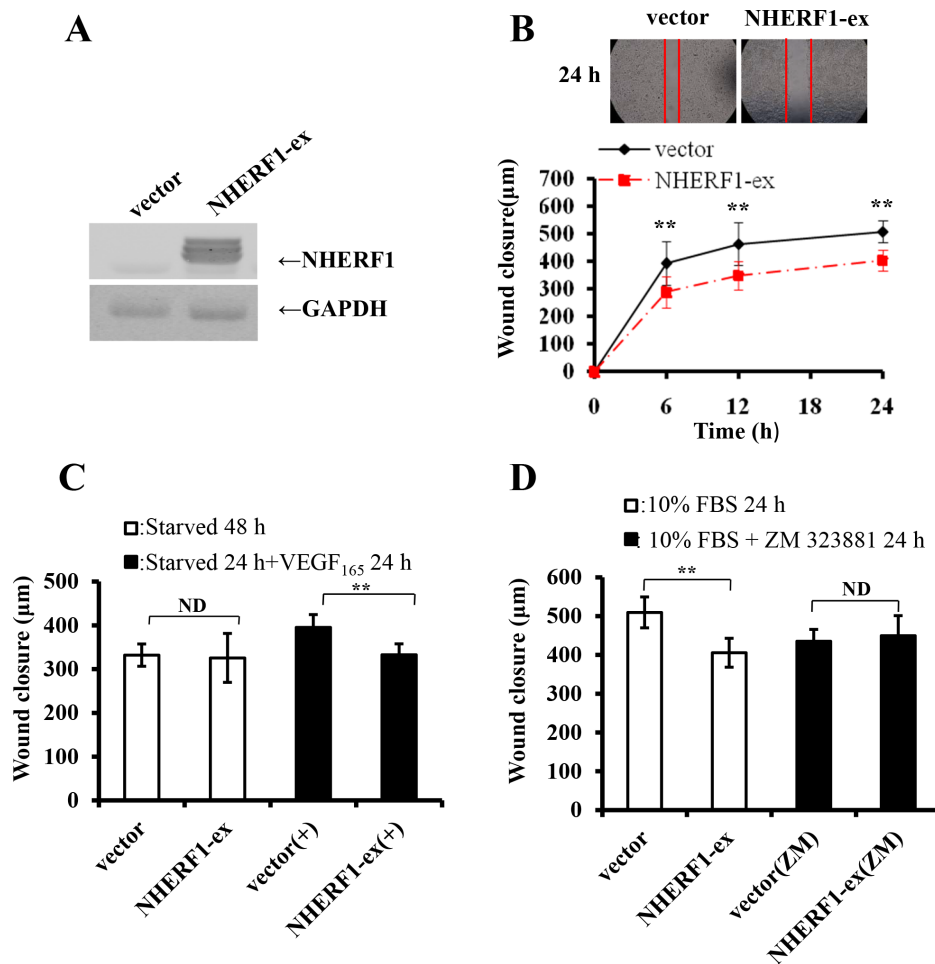

**Supplementary Figure S1: NHERF1 overexpression inhibited the migration of HRT-18 cells through the VEGFR2 pathway.** NHERF1 plasmid was transfected into HRT-18 cells and the expression of NHERF1 was assessed by Western blotting (A) Overexpression of NHERF1 inhibited cell migration (B) and VEGF<sub>165</sub>-induced cell migration (C) ZM-323881 removed the inhibitory effect of NHERF1 on cell migration (D). The results represent the mean values ± SD of three independent experiments (B, C, D). \**p* < 0.05, \*\**p* < 0.01.
